# Supplementary material
Source: PubMed Central journal article supplement (PMC4151184)
Supplement: NIHMS618521-supplement-01.pdf [file NIHMS618521-supplement-01.pdf]

**Table 2:** Maternal Gestational Weight Gain by Pre-Pregnancy Body Mass Index and Institute of Medicine Recommendations

| Maternal Pre-Pregnancy BMI | Number of Mothers | IOM Recommended Weight Gain (kg) | # Classified as Excess Gestational Weight Gain n(%) | Mean (SD) Gestational Weight Gain for Mothers with Excess GWG (kg) |
|----------------------------|-------------------|----------------------------------|-----------------------------------------------------|--------------------------------------------------------------------|
| < 18.5                     | 8                 | 12.5-18.0                        | 3 (37.5%)                                           | 22.4 (3.0)                                                         |
| 18.5-24.9                  | 218               | 11.5-16.0                        | 74 (33.9%)                                          | 20.7 (4.0)                                                         |
| 25.0-29.9                  | 131               | 7.0-11.5                         | 72 (55.0%)                                          | 17.8 (4.9)                                                         |
| ≥30.0                      | 142               | 5.0-9.0                          | 62 (43.7%)                                          | 15.8 (5.8)                                                         |

Data are presented as N (%) or median (interquartile range).

**Supplemental Table 1:** Recommended Gestational Weight Gain based on 2009 IOM Guidelines<sup>9</sup>

| Maternal Pre-Pregnancy BMI | IOM Recommended Weight Gain (kg) |
|----------------------------|----------------------------------|
| < 18.5                     | 12.5-18.0                        |
| 18.5-24.9                  | 11.5-16.0                        |
| 25.0-29.9                  | 7.0-11.5                         |
| ≥ 30.0                     | 5.0-9.0                          |

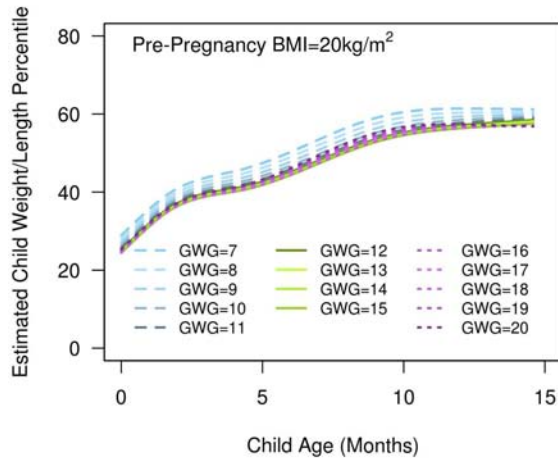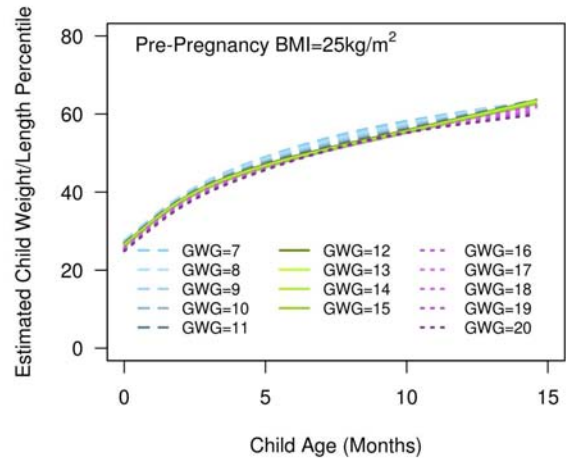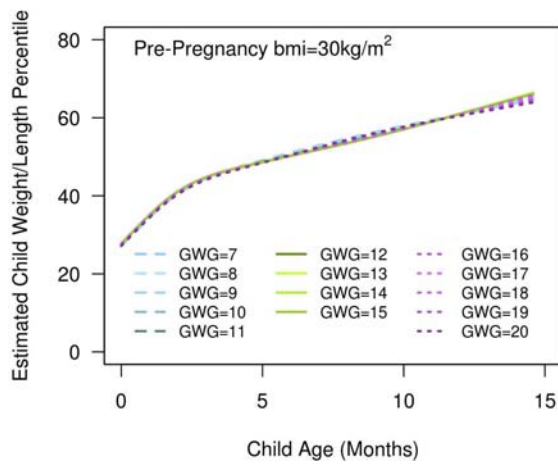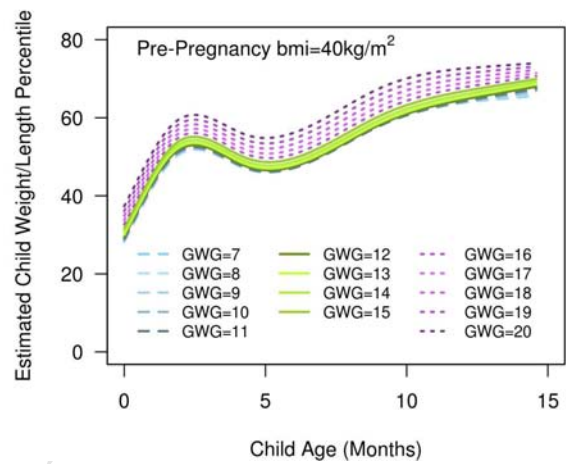

ACCEPTED
